# Supplementary material for: Identification of serum protein biomarkers for utrophin based DMD therapy
Source: PubMed Central journal article supplement (PMC5333102; doi:10.1038/srep43697), 2017-03-02
Supplement: srep43697-s1.pdf [file srep43697-s1.pdf]

# **Identification of serum protein biomarkers for utrophin based DMD therapy**

Simon Guiraud<sup>1\*</sup>, Benjamin Edwards<sup>1</sup>, Sarah E. Squire<sup>1</sup>, Arran Babbs<sup>1</sup>, Nandini Shah<sup>1</sup>,  
Adam Berg<sup>1</sup>, Huijia Chen<sup>1</sup>, Kay E. Davies<sup>1\*</sup>

<sup>1</sup> Medical Research Council Functional Genomics Unit at the University of Oxford, Department of  
Physiology, Anatomy and Genetics, Oxford OX1 3PT, United Kingdom

\*Co-correspondence

Address: Medical Research Council Functional Genomics Unit, Department of Physiology, Anatomy  
and Genetics, University of Oxford, Oxford OX1 3PT, United Kingdom

Telephone: +44 (0)1865 285880

Emails: [simon.guiraud@dpag.ox.ac.uk](mailto:simon.guiraud@dpag.ox.ac.uk) and [kay.davies@dpag.ox.ac.uk](mailto:kay.davies@dpag.ox.ac.uk)

## ***Supplemental data - Legends***

**Figure S1: Utrophin increased rescue *mdx* phenotype.** 7 week old C57, *mdx* and Fiona (n=7) were sacrificed and serum and muscles collected (A) H&E-stained transverse muscle sections of TA muscle in *mdx* mice showing necrotic areas and regenerating fibres compared to wild-type tissue. In Fiona mice, these pathological features are fully rescued due to high level of utrophin protein expression at the sarcolemma. Scale bar: 100  $\mu$ m. (B) Western blots for utrophin protein showing a 2 fold increase in *mdx* related to C57 and a 4 fold increase in Fiona mice compared to *mdx*. (C) Quantification of centronucleation necrotic muscle area in EDL showing increased in *mdx* and full rescue in Fiona mice compared to the wild-type animals. (D) Necrosis quantification, increased in *mdx* compared to C57 and rescue to normal level in Fiona animals. (E). The difference in force produced between the first and fifth stretch is represented as a sensitive indicator of the resistance of the muscle to stretch-induced damage. EDL muscles were stretched at 15% of their fibre length whilst contracting tetanically. Values are mean  $\pm$  SEM of n=7 per group; (\*) p<0.05, (\*\*) p<0.01, (\*\*\*) p<0.001.

**Figure S2: Quality control of SOMAscan data.** (A) Table of all hybridization normalization and median normalization. (B) Hybridization normalization scale per experimental groups. (C) Median normalization scale factors per dilutions and groups

**Table S1: Serum *mdx* protein biomarkers identified by SOMAscan.** High significant increased and decreased protein were defined using Mann-Witney U test (p<0.005; q<0.01).

**Table S2: Serum *mdx* protein biomarkers and rescue in *mdx* transgenic Fiona mice.** High significant increased and decreased protein were defined using Kruskal-Wallis one-way ANOVA (p<0.005; q<0.01). (+++) restored to wild-type levels (recovery score >70%), (++) restored towards

wild-type levels (50 < recovery score < 70, (+) low and inconsistent restoration towards wild-type (recovery score < 50, (-) not restored towards wild-type levels.

**Table S3: Details of the ELISA assays used in the study.** All the ELISA kits were purchased from Antibodies-online.

## ***Supplemental data – Methods***

### **Histological analyses**

Muscle samples were frozen in liquid nitrogen-chilled isopentane, and stored at -80°C. Transverse tibialis anterior (TA), were stained with Haematoxylin and Eosin solution (H&E). The Axioplan 2 Microscope System (Carl Zeiss, Germany) was used to obtain the images. The proportion of centrally nucleated fibres was determined by analysing the H&E images. Areas of necrosis were quantified based on the DMD\_M.1.2.007 MDC1A\_M.1.2.004 TREAT-NMD SOPs and performed with the Fiji ImageJ 1.49i software [1] on the whole TA sections.

### **Immunofluorescence**

Frozen transverse TA muscle sections were blocked in 10% foetal bovine serum/PBS for 20 minutes, incubated with primary antibodies overnight at 4°C, washed in PBS and incubated with suitable Alexa Fluor secondary antibodies for 1 hour at room temperature. Sections were examined under an Axioplan 2 Microscope System (Carl Zeiss, Germany). The following antibodies and dilutions were used: goat monoclonal anti-utrophin (1:2000, UtroA), mouse monoclonal anti-Laminin- $\alpha$ 2 (1:500, sc-59854, Santa Cruz Biotechnology, Inc.).

### **Protein analyses**

Western blots were performed according to standard procedures. Briefly, muscles were homogenized in RIPA buffer (R0278, Sigma-Aldrich) supplemented with protease inhibitors (1:100; P8340, Sigma-Aldrich). 30  $\mu$ g of total protein were heat-denatured for 5 minutes at 100°C before loading onto NuPAGE 3– 8% TRIS Acetate Midi Gel (Novex, Life Technologies) and transferred to PVDF membranes (Millipore). Membranes were blocked for 1 hour with 10% skimmed milk in 0.1% PBS-Tween20 and then incubated with primary antibodies in 0.1% PBS-T for 1 hour at room temperature. Primary antibodies used were: mouse monoclonal anti-utrophin (1:50, MANCHO3(84A), gift from

G.E. Morris) and goat polyclonal  $\alpha$ -actinin Antibody (N-19) (1:30000, sc-7453, Santa Cruz). HRP-labelled secondary antibodies (Amersham) were incubated for 1 hour at room temperature. Immunoreactive bands were detected using ECL Western Blot Detection Reagents (SuperSignal West Pico Chemiluminescent Substrate, Thermo Scientific). The relative expression of the target proteins was estimated by densitometry using Actinin N-19 as references on a Xograph Compact X4 developer and quantified with the Fiji ImageJ 1.49i software.

### **Isolated muscle function analysis**

Peak force, specific force, and force drop were measured from the extensor digitorum longus muscle of the treated and control mice. During dissection and experiments, muscles were bathed in oxygenated (95% O<sub>2</sub>–5% CO<sub>2</sub>) Krebs–Hensley solution composed of (mmol/l): NaCl, 118; NaHCO<sub>3</sub>, 24.8, KCl, 4.75; KH<sub>2</sub>PO<sub>4</sub>, 1.18; MgSO<sub>4</sub>, 1.18; CaCl<sub>2</sub>, 2.54; glucose, 10 [2]. Contractile properties were measured as previously described [3]. In brief, isolated EDL were attached to a lever arm connected to a force transducer (model 300B); and stimulator (model 701B); the equipment was controlled using the signal interface (model 604A) and results were recorded by the DMC software (version 4.1.4; Aurora Scientific, Aurora, Ontario, Canada). The muscle was stimulated by single pulses of 0.2 milliseconds at 30 V while the optimum length ( $L_o$ ) was determined. Optimum fibre length ( $L_f$ ) was calculated by multiplying  $L_o$  by the predetermined fibre length to muscle length ratio of 0.44 [4]. A force–frequency curve was generated and the maximum isometric force calculated. Absolute force ( $P_o$ ) are normalized to specific force ( $sP_o$ ; kN/m<sup>2</sup>) using the equation (muscle mass/ $L_f$  x1.06 (the density of mammalian muscle). Percentage force drop were calculated by comparing maximum force between the first (ECC0) and fifth eccentric (ECC5) contractions, expressed as a percentage of ECC0. The muscle was stimulated into tetanus at the frequency required to generate the  $P_o$ , while in tetanic state the muscle was stretched at a rate of one fibre length per second for 0.15 seconds, equating to a total stretch of 15% of fibre length. All data were digitized and analysed using the DMA software (version 3.2; Aurora Scientific).

Supplemental data –Figures/Tables

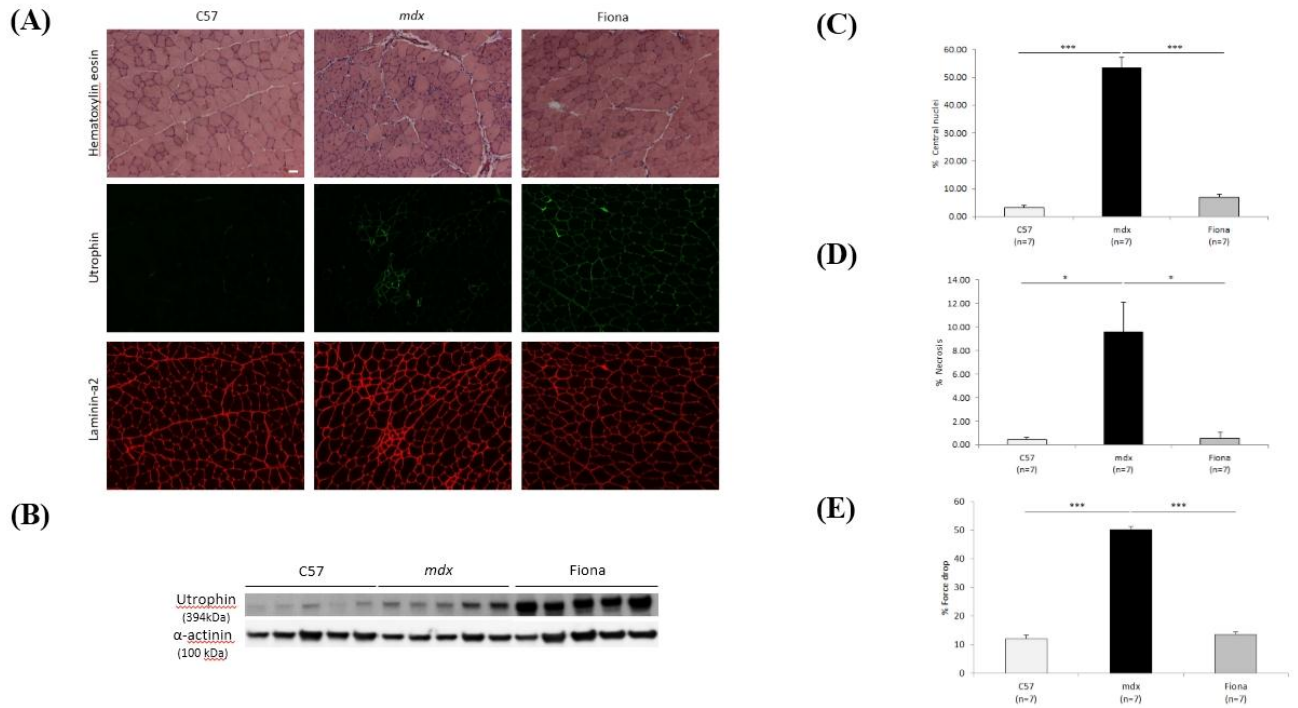

Figure S1: Utrophin increased rescue *mdx* phenotype.

(A)

| Group | Sample    | HybControlNormScale | RowCheck | Median Normalisation Scale Factor |             |               |
|-------|-----------|---------------------|----------|-----------------------------------|-------------|---------------|
|       |           |                     |          | Dilution 5%                       | Dilution 2% | Dilution 0.5% |
| C57   | C57 - 1   | 0.958               | PASS     | 1.058                             | 1.035       | 1.009         |
|       | C57 - 2   | 0.993               | PASS     | 1.037                             | 1.06        | 1.033         |
|       | C57 - 3   | 0.903               | PASS     | 0.954                             | 0.929       | 0.957         |
|       | C57 - 4   | 1.011               | PASS     | 1.009                             | 1.018       | 1.018         |
|       | C57 - 5   | 1.12                | PASS     | 1.044                             | 1.064       | 1.026         |
|       | C57 - 6   | 1.001               | PASS     | 0.938                             | 0.931       | 0.977         |
|       | C57 - 7   | 0.956               | PASS     | 0.935                             | 0.936       | 0.967         |
|       | AVG       | 0.992               | PASS     | 0.996                             | 0.996       | 0.998         |
| STDev | 0.067     | PASS                | 0.053    | 0.062                             | 0.031       |               |
| mdx   | mdx - 1   | 1.022               | PASS     | 1.271                             | 1.223       | 1.227         |
|       | mdx - 2   | 0.99                | PASS     | 1.006                             | 1.006       | 0.979         |
|       | mdx - 3   | 1.032               | PASS     | 0.9                               | 0.956       | 1.014         |
|       | mdx - 4   | 1                   | PASS     | 1.124                             | 1.125       | 1.087         |
|       | mdx - 5   | 1.008               | PASS     | 0.974                             | 0.953       | 0.947         |
|       | mdx - 6   | 0.959               | PASS     | 0.913                             | 0.938       | 0.932         |
|       | mdx - 7   | 1.088               | PASS     | 0.896                             | 0.933       | 0.818         |
|       | AVG       | 1.014               | PASS     | 1.012                             | 1.019       | 1.001         |
| STDev | 0.040     | PASS                | 0.140    | 0.112                             | 0.129       |               |
| Fiona | Fiona - 1 | 1.008               | PASS     | 0.999                             | 0.959       | 1.002         |
|       | Fiona - 2 | 0.984               | PASS     | 0.901                             | 0.944       | 0.994         |
|       | Fiona - 3 | 1.022               | PASS     | 1.175                             | 1.207       | 1.034         |
|       | Fiona - 4 | 0.988               | PASS     | 0.738                             | 0.769       | 0.859         |
|       | Fiona - 5 | 0.957               | PASS     | 1.08                              | 1.085       | 1.073         |
|       | Fiona - 6 | 1.04                | PASS     | 1.107                             | 1.119       | 1.114         |
|       | Fiona - 7 | 1.118               | PASS     | 1.012                             | 1.033       | 0.931         |
|       | AVG       | 1.017               | PASS     | 1.002                             | 1.017       | 1.001         |
| STDev | 0.052     | PASS                | 0.146    | 0.142                             | 0.086       |               |

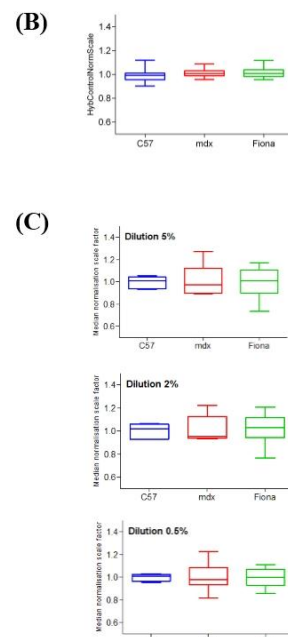

Figure

S2: Quality control of SOMAscan data.

| Rank | Protein                                                           | Target         | Uniprot | Dilution | Fold change (mdx vs C57) | pValue |
|------|-------------------------------------------------------------------|----------------|---------|----------|--------------------------|--------|
| 1    | Tumor necrosis factor receptor superfamily member 18              | TNFRSF18/GITR  | Q9Y5U5  | 5        | 25.4                     | 0.0001 |
| 2    | Troponin I, fast skeletal muscle                                  | TNNI2          | P48788  | 5        | 10.2                     | 0.0002 |
| 3    | Myosin-binding protein C, slow-type                               | MYBPC1         | Q00872  | 5        | 7.7                      | 0.0003 |
| 4    | Fibrinogen                                                        | FGA            | P02671  | 0.5      | 6.5                      | 0.0001 |
| 5    | Calcium/calmodulin-dependent protein kinase type II subunit beta  | CAMK2B         | Q13554  | 5        | 5.9                      | 0.0001 |
| 6    | Fibrinogen gamma chain                                            | FGG            | P02679  | 0.5      | 4.8                      | 0.0001 |
| 7    | Adenylate kinase isoenzyme 1                                      | AK1            | P00568  | 2        | 4.7                      | 0.0007 |
| 8    | Acidic leucine-rich nuclear phosphoprotein 32 family member B     | ANP32B         | Q92688  | 2        | 4.6                      | 0.0003 |
| 9    | Troponin T, cardiac muscle                                        | TNNT2          | P45379  | 5        | 4.6                      | 0.0011 |
| 10   | Thrombospondin-4                                                  | THBS4          | P35443  | 0.5      | 4.5                      | 0.0002 |
| 11   | Calcium/calmodulin-dependent protein kinase type II subunit delta | CAMK2D         | Q13557  | 5        | 4.5                      | 0.0001 |
| 12   | Serine protease HTRA2, mitochondrial                              | HTRA2          | Q43464  | 5        | 4.2                      | 0.0001 |
| 13   | Calcium/calmodulin-dependent protein kinase type II subunit alpha | CAMK2A         | Q9UQM7  | 5        | 4.2                      | 0.0003 |
| 14   | Tyrosine-protein kinase Lyn                                       | LYN            | P07948  | 5        | 4.0                      | 0.0003 |
| 15   | Tyrosine-protein kinase Lyn, isoform B                            | LYNB           | P07948  | 5        | 4.0                      | 0.0003 |
| 16   | Proliferating cell nuclear antigen                                | PCNA           | P12004  | 5        | 4.0                      | 0.0012 |
| 17   | Eukaryotic translation initiation factor 4 gamma 2                | EIF4G2         | P78344  | 5        | 4.0                      | 0.0012 |
| 18   | 60 kDa heat shock protein, mitochondrial                          | HSP60          | P10809  | 5        | 3.7                      | 0.0006 |
| 19   | Tyrosine-protein kinase Fyn                                       | FYN            | P06241  | 5        | 3.5                      | 0.0004 |
| 20   | Tyrosine-protein kinase Yes                                       | YES1           | P07947  | 5        | 3.5                      | 0.0003 |
| 21   | Creatine kinase M-type                                            | CKM            | P06732  | 2        | 3.5                      | 0.0011 |
| 22   | Mitogen-activated protein kinase 8                                | MAPK8          | P45983  | 5        | 3.4                      | 0.0007 |
| 23   | L-lactate dehydrogenase B chain                                   | LDHB           | P07195  | 0.5      | 3.3                      | 0.0005 |
| 24   | 40S ribosomal protein S3                                          | RPS3           | P23396  | 5        | 3.2                      | 0.0005 |
| 25   | PIK3CA/PIK3R1                                                     | PIK3CA PIK3R1  | P42336  | 5        | 3.1                      | 0.0001 |
| 26   | 40S ribosomal protein S3a                                         | RPS3A          | P61247  | 5        | 3.1                      | 0.0006 |
| 27   | Cytochrome c                                                      | CYCS           | P99999  | 5        | 3.0                      | 0.0013 |
| 28   | Proto-oncogene tyrosine-protein kinase Src                        | SRC            | P12931  | 5        | 3.0                      | 0.0007 |
| 29   | Protein kinase C alpha type                                       | PRKCA          | P17252  | 5        | 3.0                      | 0.0006 |
| 30   | D-dimer                                                           | FGA FGB FGG    | P02671  | 0.5      | 2.9                      | 0.0001 |
| 31   | Calpain I                                                         | CAPN1 CAPN1    | P07384  | 2        | 2.9                      | 0.0001 |
| 32   | RAC-beta serine/threonine-protein kinase                          | AKT2           | P31751  | 5        | 2.8                      | 0.0010 |
| 33   | Mitogen-activated protein kinase 14                               | MAPK14         | Q16539  | 2        | 2.8                      | 0.0005 |
| 34   | Peptidyl-prolyl cis-trans isomerase D                             | PPID           | Q08752  | 5        | 2.8                      | 0.0008 |
| 35   | Troponin I, cardiac muscle                                        | TNNI3          | P19429  | 5        | 2.8                      | 0.0036 |
| 36   | RAC-alpha/beta/gamma serine/threonine-protein kinase              | AKT1 AKT2 AKT3 | P31749  | 2        | 2.7                      | 0.0007 |
| 37   | Coiled-coil domain-containing protein 80                          | CDCDC80        | Q76M96  | 2        | 2.7                      | 0.0002 |
| 38   | Tyrosine-protein phosphatase non-receptor type 11                 | PTPN11         | Q06124  | 5        | 2.6                      | 0.0010 |
| 39   | 40S ribosomal protein S7                                          | RPS7           | P62081  | 5        | 2.5                      | 0.0009 |
| 40   | Heat shock protein HSP 90-alpha/beta                              | HSP90AA1/AB1   | P07900  | 2        | 2.5                      | 0.0004 |
| 41   | Ribosomal protein S6 kinase alpha-3                               | RPS6KA3        | P51812  | 5        | 2.5                      | 0.0005 |
| 42   | cAMP-dependent protein kinase catalytic subunit alpha             | PRKACA         | P17612  | 5        | 2.5                      | 0.0012 |
| 43   | Dual specificity mitogen-activated protein kinase kinase 1        | MAP2K1         | Q02750  | 5        | 2.4                      | 0.0001 |
| 44   | Dual specificity protein phosphatase 3                            | DUSP3          | P51452  | 5        | 2.4                      | 0.0020 |
| 45   | Pro-opiomelanocortin                                              | POMC           | P01189  | 5        | 2.4                      | 0.0006 |
| 46   | Heat shock 70 kDa protein 1A                                      | HSPA1A         | P0DMV8  | 5        | 2.4                      | 0.0004 |
| 47   | Casein kinase II 2-alpha':2-beta heterotetramer                   | CSNK2A2 CSNK2B | P19784  | 5        | 2.4                      | 0.0043 |
| 48   | Glycogen synthase kinase-3 alpha/beta                             | GSK3A GSK3B    | P49840  | 5        | 2.4                      | 0.0011 |
| 49   | Mitogen-activated protein kinase 12                               | MAPK12         | P53778  | 5        | 2.4                      | 0.0004 |
| 50   | 3-phosphoinositide-dependent protein kinase 1                     | PDPK1          | Q15530  | 5        | 2.3                      | 0.0020 |
| 51   | Heat shock cognate 71 kDa protein                                 | HSPA8          | P11142  | 2        | 2.3                      | 0.0003 |
| 52   | ATP-dependent RNA helicase DDX19B                                 | DDX19B         | Q9UMR2  | 5        | 2.3                      | 0.0006 |
| 53   | 14-3-3 protein family                                             | YWHA8          | P31946  | 2        | 2.3                      | 0.0003 |
| 54   | Protein FAM3D                                                     | FAM3D          | Q96BQ1  | 5        | 2.2                      | 0.0001 |
| 55   | NAD-dependent protein deacetylase sirtuin-2                       | SIRT2          | Q8IXJ6  | 5        | 2.2                      | 0.0014 |
| 56   | Xaa-Pro aminopeptidase 1                                          | XPNPEP1        | Q9NQW7  | 5        | 2.2                      | 0.0008 |
| 57   | Receptor-type tyrosine-protein kinase FLT3                        | FLT3           | P36888  | 5        | 2.2                      | 0.0018 |
| 58   | Protein kinase C beta type (splice variant beta-II)               | PRKCB          | P05771  | 2        | 2.2                      | 0.0016 |
| 59   | Tumor necrosis factor receptor superfamily member 27              | EDA2R          | Q9HAV5  | 5        | 2.2                      | 0.0001 |
| 60   | Osteocalcin                                                       | BGLAP          | P02818  | 2        | 2.2                      | 0.0012 |
| 61   | Histone H2A.z                                                     | H2AFZ          | P0C0S5  | 5        | 2.2                      | 0.0001 |
| 62   | Tyrosine-protein kinase CSK                                       | CSK            | P41240  | 2        | 2.1                      | 0.0027 |
| 63   | Mothers against decapentaplegic homolog 3                         | SMAD3          | P84022  | 5        | 2.1                      | 0.0016 |
| 64   | Secreted and transmembrane protein 1                              | SECTM1         | Q8WVNG  | 2        | 2.1                      | 0.0003 |
| 65   | Follistatin-related protein 1                                     | FSTL1          | Q12841  | 2        | 2.1                      | 0.0004 |
| 66   | beta-adrenergic receptor kinase 1                                 | ADRBK1         | P25098  | 5        | 2.1                      | 0.0012 |
| 67   | Hemojuvelin                                                       | HFE2           | Q6ZVN8  | 2        | 2.0                      | 0.0010 |
| 68   | Intercellular adhesion molecule 2                                 | ICAM2          | P13598  | 2        | 2.0                      | 0.0001 |
| 69   | Alpha-soluble NSF attachment protein                              | NAPA           | P54920  | 2        | 2.0                      | 0.0006 |
| 70   | Protein S100-A12                                                  | S100A12        | P80511  | 2        | 2.0                      | 0.0013 |
| 71   | MAP kinase-activated protein kinase 3                             | MAPKAP3        | Q16644  | 2        | 2.0                      | 0.0031 |
| 72   | Repulsive guidance molecule A                                     | RGMA           | Q96886  | 2        | 2.0                      | 0.0005 |
| 73   | Mitochondrial import inner membrane translocase subunit TIM14     | DNAJC19        | Q96DA6  | 5        | 2.0                      | 0.0001 |
| 74   | Tyrosine-protein kinase Fer                                       | FER            | P16591  | 5        | 2.0                      | 0.0012 |
| 75   | Triosephosphate isomerase                                         | TPI1           | P60174  | 2        | 2.0                      | 0.0034 |
| 76   | Growth factor receptor-bound protein 2                            | GRB2           | P62993  | 5        | 2.0                      | 0.0008 |
| 77   | Hsp90 co-chaperone Cdc37                                          | CDC37          | Q16543  | 5        | 2.0                      | 0.0012 |
| 78   | Methionine aminopeptidase 2                                       | METAP2         | P50579  | 5        | 2.0                      | 0.0010 |
| 79   | Nidogen-1                                                         | NID1           | P14543  | 2        | 2.0                      | 0.0003 |
| 80   | Contactin-1                                                       | CNTN1          | Q12860  | 0.5      | 0.7                      | 0.0013 |
| 81   | Growth/differentiation factor 8                                   | MSTN           | O14793  | 0.5      | 0.7                      | 0.0033 |
| 82   | Tumor necrosis factor receptor superfamily member 25              | TNFRSF25       | Q93038  | 5        | 0.7                      | 0.005  |
| 83   | Desmoglein-2                                                      | DSG2           | Q14126  | 0.5      | 0.4                      | 0.0005 |

**Table S1: Serum *mdx* protein biomarkers identified by SOMAscan.**

| Rank | Protein                                                           | Target         | Uniprot       | Dilution | Fold change (mdx vs C57) | pValue | Recovery score (Fiona) |
|------|-------------------------------------------------------------------|----------------|---------------|----------|--------------------------|--------|------------------------|
| 1    | Tumor necrosis factor receptor superfamily member 18              | TNFRSF18/GITR  | Q9Y5U5        | 5        | 25.4                     | 0.0001 | +++                    |
| 2    | Troponin I, fast skeletal muscle                                  | TNNI2          | P48788        | 5        | 10.2                     | 0.0002 | ++                     |
| 3    | Myosin-binding protein C, slow-type                               | MYBPC1         | Q00872        | 5        | 7.7                      | 0.0003 | ++                     |
| 4    | Fibrinogen                                                        | FGA            | P02671        | 0.5      | 6.5                      | 0.0001 | -                      |
| 5    | Calcium/calmodulin-dependent protein kinase type II subunit beta  | CAMK2B         | Q13554        | 5        | 5.9                      | 0.0001 | ++                     |
| 6    | Fibrinogen gamma chain                                            | FGG            | P02679        | 0.5      | 4.8                      | 0.0001 | -                      |
| 7    | Adenylate kinase isoenzyme 1                                      | AK1            | P00568        | 2        | 4.7                      | 0.0007 | ++                     |
| 8    | Acidic leucine-rich nuclear phosphoprotein 32 family member B     | ANP32B         | Q92688        | 2        | 4.6                      | 0.0003 | +++                    |
| 9    | Troponin T, cardiac muscle                                        | TNNT2          | P45379        | 5        | 4.6                      | 0.0011 | +++                    |
| 10   | Thrombospondin-4                                                  | THBS4          | P35443        | 0.5      | 4.5                      | 0.0002 | +++                    |
| 11   | Calcium/calmodulin-dependent protein kinase type II subunit delta | CAMK2D         | Q13557        | 5        | 4.5                      | 0.0001 | ++                     |
| 12   | Serine protease HTRA2, mitochondrial                              | HTRA2          | O43464        | 5        | 4.2                      | 0.0001 | +++                    |
| 13   | Calcium/calmodulin-dependent protein kinase type II subunit alpha | CAMK2A         | Q9UQM7        | 5        | 4.2                      | 0.0003 | +++                    |
| 14   | Tyrosine-protein kinase Lyn                                       | LYN            | P07948        | 5        | 4.0                      | 0.0003 | ++                     |
| 15   | Tyrosine-protein kinase Lyn, isoform B                            | LYN            | P07948        | 5        | 4.0                      | 0.0003 | +++                    |
| 16   | Proliferating cell nuclear antigen                                | PCNA           | P12004        | 5        | 4.0                      | 0.0012 | +++                    |
| 17   | Eukaryotic translation initiation factor 4 gamma 2                | EIF4G2         | P78344        | 5        | 4.0                      | 0.0012 | -                      |
| 18   | 60 kDa heat shock protein, mitochondrial                          | HSP60          | P10809        | 5        | 3.7                      | 0.0006 | +++                    |
| 19   | Tyrosine-protein kinase Fyn                                       | FYN            | P06241        | 5        | 3.5                      | 0.0004 | +++                    |
| 20   | Myoglobin                                                         | MB             | P02144        | 2        | 3.5                      | 0.0011 | +++                    |
| 21   | Tyrosine-protein kinase Yes                                       | YES1           | P07947        | 5        | 3.5                      | 0.0003 | ++                     |
| 22   | Creatine kinase M-type                                            | CKM            | P06732        | 2        | 3.5                      | 0.0011 | +                      |
| 23   | Mitogen-activated protein kinase 8                                | MAPK8          | P45983        | 5        | 3.4                      | 0.0007 | +                      |
| 24   | L-lactate dehydrogenase B chain                                   | LDHB           | P07195        | 0.5      | 3.3                      | 0.0005 | ++                     |
| 25   | 40S ribosomal protein S3                                          | RPS3           | P23396        | 5        | 3.2                      | 0.0005 | -                      |
| 26   | PIK3CA/PIK3R1                                                     | PIK3CA PIK3R1  | P42336        | 5        | 3.1                      | 0.0001 | ++                     |
| 27   | 40S ribosomal protein S3a                                         | RPS3A          | P61247        | 5        | 3.1                      | 0.0006 | +++                    |
| 28   | Cytochrome c                                                      | CYCS           | P99999        | 5        | 3.0                      | 0.0013 | +++                    |
| 29   | Proto-oncogene tyrosine-protein kinase Src                        | SRC            | P12931        | 5        | 3.0                      | 0.0007 | ++                     |
| 30   | D-dimer                                                           | FGA FGB FGG    | P02671        | 0.5      | 2.9                      | 0.0001 | -                      |
| 31   | Calpain I                                                         | CAPN1 CAPNS1   | P07384        | 2        | 2.9                      | 0.0001 | +++                    |
| 32   | RAC-beta serine/threonine-protein kinase                          | AKT2           | P31751        | 5        | 2.8                      | 0.0010 | -                      |
| 33   | Mitogen-activated protein kinase 14                               | MAPK14         | Q16539        | 2        | 2.8                      | 0.0005 | +                      |
| 34   | Peptidyl-prolyl cis-trans isomerase D                             | PPID           | Q08752        | 5        | 2.8                      | 0.0008 | -                      |
| 35   | Troponin I, cardiac muscle                                        | TNNI3          | P19429        | 5        | 2.8                      | 0.0036 | -                      |
| 36   | RAC-alpha/beta/gamma serine/threonine-protein kinase              | AKT1 AKT2 AKT3 | P31749        | 2        | 2.7                      | 0.0007 | -                      |
| 37   | Coiled-coil domain-containing protein 80                          | CCDC80         | Q76M96        | 2        | 2.7                      | 0.0002 | ++                     |
| 38   | Tyrosine-protein phosphatase non-receptor type 11                 | PTPN11         | Q06124        | 5        | 2.6                      | 0.0010 | ++                     |
| 39   | 40S ribosomal protein S7                                          | RPS7           | P62081        | 5        | 2.5                      | 0.0009 | +++                    |
| 40   | Heat shock protein HSP 90-alpha/beta                              | HSP90AA1/AB1   | P07900        | 2        | 2.5                      | 0.0004 | +                      |
| 41   | Ribosomal protein S6 kinase alpha-3                               | RPSEKA3        | P51812        | 5        | 2.5                      | 0.0005 | +                      |
| 42   | cAMP-dependent protein kinase catalytic subunit alpha             | PRKACA         | P17612        | 5        | 2.5                      | 0.0012 | -                      |
| 43   | Dual specificity mitogen-activated protein kinase kinase 1        | MAP2K1         | Q02750        | 5        | 2.4                      | 0.0001 | -                      |
| 44   | Dual specificity protein phosphatase 3                            | DUS3           | P51452        | 5        | 2.4                      | 0.0020 | +++                    |
| 45   | Heat shock 70 kDa protein 1A                                      | HSPA1A         | P0DMV8        | 5        | 2.4                      | 0.0004 | +                      |
| 46   | Casein kinase II 2-alpha'-2-beta heterotetramer                   | CSNK2A2 CSNK2B | P19784        | 5        | 2.4                      | 0.0043 | +++                    |
| 47   | Glycogen synthase kinase-3 alpha/beta                             | GSK3A GSK3B    | P49840        | 5        | 2.4                      | 0.0011 | -                      |
| 48   | Mitogen-activated protein kinase 12                               | MAPK12         | P53778        | 5        | 2.4                      | 0.0004 | ++                     |
| 49   | 3-phosphoinositide-dependent protein kinase 1                     | PDPK1          | O15530        | 5        | 2.3                      | 0.0020 | ++                     |
| 50   | Heat shock cognate 71 kDa protein                                 | HSPAB          | P11142        | 2        | 2.3                      | 0.0003 | ++                     |
| 51   | ATP-dependent RNA helicase DDX19B                                 | DDX19B         | Q9UMR2        | 5        | 2.3                      | 0.0006 | +                      |
| 52   | 14-3-3 protein family                                             | YWHA8          | P31946        | 2        | 2.3                      | 0.0003 | ++                     |
| 53   | Protein FAM3D                                                     | FAM3D          | Q96BQ1        | 5        | 2.2                      | 0.0001 | +++                    |
| 54   | NAD-dependent protein deacetylase sirtuin-2                       | SIRT2          | Q8IXJ6        | 5        | 2.2                      | 0.0014 | +++                    |
| 55   | Xaa-Pro aminopeptidase 1                                          | XPNPEP1        | Q9NQW7        | 5        | 2.2                      | 0.0008 | +++                    |
| 56   | Receptor-type tyrosine-protein kinase FLT3                        | FLT3           | P36888        | 5        | 2.2                      | 0.0018 | +                      |
| 57   | Protein kinase C beta type (splice variant beta-II)               | PRKCB          | P05771        | 2        | 2.2                      | 0.0016 | -                      |
| 58   | Tumor necrosis factor receptor superfamily member 27              | EDA2R          | Q9HAV5        | 5        | 2.2                      | 0.0001 | +++                    |
| 59   | Osteocalcin                                                       | BGLAP          | P02818        | 2        | 2.2                      | 0.0012 | +++                    |
| 60   | Histone H2A.z                                                     | H2AFZ          | P0C055        | 5        | 2.2                      | 0.0001 | +++                    |
| 61   | Tyrosine-protein kinase CSK                                       | CSK            | P41240        | 2        | 2.1                      | 0.0027 | -                      |
| 62   | Mothers against decapentaplegic homolog 3                         | SMAD3          | P84022        | 5        | 2.1                      | 0.0016 | +++                    |
| 63   | Secreted and transmembrane protein 1                              | SECTM1         | Q8WVN6        | 2        | 2.1                      | 0.0003 | +++                    |
| 64   | Follistatin-related protein 1                                     | FSTL1          | Q12841        | 2        | 2.1                      | 0.0004 | +++                    |
| 65   | beta-adrenergic receptor kinase 1                                 | ADRBK1         | P25098        | 5        | 2.1                      | 0.0012 | +++                    |
| 66   | Hemojuvelin                                                       | HFE2           | Q6ZVN8        | 2        | 2.0                      | 0.0010 | +++                    |
| 67   | Intercellular adhesion molecule 2                                 | ICAM2          | P13598        | 2        | 2.0                      | 0.0001 | +++                    |
| 68   | Alpha-soluble NSF attachment protein                              | NAPA           | P54920        | 2        | 2.0                      | 0.0006 | +                      |
| 69   | Protein S100-A12                                                  | S100A12        | P80511        | 2        | 2.0                      | 0.0013 | +++                    |
| 70   | MAP kinase-activated protein kinase 3                             | MAPKAPK3       | Q16644        | 2        | 2.0                      | 0.0031 | -                      |
| 71   | Repulsive guidance molecule A                                     | RGMA           | Q96886        | 2        | 2.0                      | 0.0005 | +++                    |
| 72   | Mitochondrial import inner membrane translocase subunit TIM14     | DNAJC19        | Q96DA6        | 5        | 2.0                      | 0.0001 | +++                    |
| 73   | Triosephosphate isomerase                                         | TPI1           | P60174        | 2        | 2.0                      | 0.0034 | ++                     |
| 74   | Growth factor receptor-bound protein 2                            | GRB2           | P62993        | 5        | 2.0                      | 0.0008 | -                      |
| 75   | Casein kinase II 2-alpha'-2-beta heterotetramer                   | CSNK2A1 CSNK2B | P68400 P67870 | 5        | 2.0                      | 0.0004 | +++                    |
| 76   | Hsp90 co-chaperone Cdc37                                          | CDC37          | Q16543        | 5        | 2.0                      | 0.0012 | -                      |
| 77   | Methionine aminopeptidase 2                                       | METAP2         | P50579        | 5        | 2.0                      | 0.001  | +++                    |
| 78   | Nidogen-1                                                         | NID1           | P14543        | 2        | 2.0                      | 0.0003 | +                      |
| 79   | Contactin-1                                                       | CNTN1          | Q12860        | 0.5      | 0.7                      | 0.0013 | +++                    |
| 80   | Growth/differentiation factor 11/8                                | GDF11, MSTN    | Q95390 O14793 | 2        | 0.7                      | 0.0036 | +++                    |
| 81   | Bcl-2-like protein 2                                              | BCL2L2         | Q92843        | 5        | 0.7                      | 0.0006 | -                      |
| 82   | beta-nerve growth factor                                          | NGF            | P01138        | 5        | 0.7                      | 0.0006 | -                      |
| 83   | E3 ubiquitin-protein ligase ZNRF3                                 | ZNRF3          | Q9ULT6        | 5        | 0.7                      | 0.0009 | -                      |
| 84   | Growth/differentiation factor 8                                   | MSTN           | Q14793        | 0.5      | 0.7                      | 0.0033 | +++                    |
| 85   | Tumor necrosis factor receptor superfamily member 25              | TNFRSF25       | Q93038        | 5        | 0.7                      | 0.005  | -                      |
| 86   | Neurogenic locus notch homolog protein 2                          | NOTCH2         | Q04721        | 5        | 0.6                      | 0.0005 | -                      |
| 87   | Glucose-6-phosphate isomerase                                     | GPI            | P06744        | 5        | 0.6                      | 0.0018 | -                      |
| 88   | Plasminogen                                                       | PLG            | P00747        | 0.5      | 0.4                      | 0.0012 | -                      |
| 89   | Desmoglein-2                                                      | DSG2           | Q14126        | 0.5      | 0.4                      | 0.0005 | ++                     |

**Table S2: Serum *mdx* protein biomarkers and rescue in *mdx* transgenic Fiona mice.**



| Target | Catalog Number | Detection range  | Sensitivity | Comments                     |
|--------|----------------|------------------|-------------|------------------------------|
| ANP32B | ABIN1745100    |                  | 0.1ng/ml    |                              |
| CAMK2A | ABIN426487     | 0.31-20 ng/mL    | 0.118 ng/mL | Sample below detection limit |
| GITR   | ABIN1672796    | 62.5-4000 pg/mL  | <10pg/mL    |                              |
| SIRT2  | ABIN416762     | 1.56-100 ng/mL   | 0.65 ng/mL  |                              |
| THBS4  | ABIN426909     | 0.312-20 ng/mL   | 0.64 ng/mL  |                              |
| TNNT2  | ABIN426397     | 15.63-1000 pg/mL | 6.2 pg/mL   |                              |

**Table S3: Details of the ELISA assays used in the study.**

## References

- 1 Schindelin, J. *et al.* Fiji: an open-source platform for biological-image analysis. *Nature methods* **9**, 676-682, doi:10.1038/nmeth.2019 (2012).
- 2 Barclay, C. J., Woledge, R. C. & Curtin, N. A. Effects of UCP3 genotype, temperature and muscle type on energy turnover of resting mouse skeletal muscle. *Pflugers Archiv : European journal of physiology* **457**, 857-864, doi:10.1007/s00424-008-0552-z (2009).
- 3 Lynch, G. S., Hinkle, R. T. & Faulkner, J. A. Power output of fast and slow skeletal muscles of mdx (dystrophic) and control mice after clenbuterol treatment. *Experimental physiology* **85**, 295-299 (2000).
- 4 Brooks, S. V. & Faulkner, J. A. Contractile properties of skeletal muscles from young, adult and aged mice. *The Journal of physiology* **404**, 71-82 (1988).
